# Supplementary material
Source: Springer Nature journal article supplement (https://www.springermedizin.de/resource/supplementary/13256_2011_2035_MOESM3_ESM.pdf/9648842)
Supplement: MOESM3 [file 9648842]

|                                                                      | <b>Day of admission</b> | <b>Day before discharge</b> |
|----------------------------------------------------------------------|-------------------------|-----------------------------|
| Hemoglobin (ref.: 11.5 – 15.0 g/dl)                                  | 6                       | 12                          |
| Thrombocytes (ref.: 150 – 350 × 10 <sup>6</sup> × μl <sup>-1</sup> ) | 17.7                    | 228                         |
| LDH (ref.: <350 U/l)                                                 | 963                     | 237                         |
| Haptoglobin (ref.: 0.45 – 2.05 g/l)                                  | <0,2                    | 0.69                        |
| Fragmentocytes (ref.: <5‰)                                           | 10                      | <5                          |
| Creatinine (ref.: 0.55 – 1.02 mg/dl)                                 | 0.89                    | 0.78                        |
